# Supplementary material for: Three different types of bridging ligands in a 3d–3d′–3d′′ heterotrimetallic chain
Source: Royal Society of Chemistry journal article supplement (doi:10.1039/c7dt04586g), 2017-12-14
Supplement: c7dt04586g1.pdf [file c7dt04586g1.pdf]

## Electronic supplementary information

### Three different types of bridging ligands in a 3d-3d'-3d'' heterotrimetallic chain

Maria-Gabriela Alexandru,<sup>a</sup> Diana Visinescu,<sup>b</sup> Sergiu Shova,<sup>c</sup> Marius Andruh<sup>d</sup>, Francesc Lloret,<sup>e</sup> Joan Cano<sup>e</sup> and Miguel Julve

<sup>a</sup> Department of Inorganic Chemistry, Physical Chemistry and Electrochemistry, Faculty of Applied Chemistry and Materials Science, University Politehnica of Bucharest, 1-7 Gh. Polizu Street, 011061, Bucharest, Romania

<sup>b</sup> Coordination and Supramolecular Chemistry Laboratory, "Ilie Murgulescu" Institute of Physical Chemistry, Romanian Academy, Splaiul Independentei 202, Bucharest, 060021, Romania

<sup>c</sup> "Petru Poni" Institute of Macromolecular Chemistry of the Romanian Academy, Aleea Grigore Ghica Voda 41-A, RO-700487 Iasi, Romania

<sup>d</sup> Inorganic Chemistry Laboratory, Faculty of Chemistry, University of Bucharest, Str. Dumbrava Rosie 23, 020464-Bucharest, Romania

<sup>e</sup> Departament de Química Inorgànica/Instituto de Ciencia Molecular (ICMol), Facultat de Química de la Universitat de València, C/ Catedrático José Beltrán 2, 46980 Paterna, València, Spain

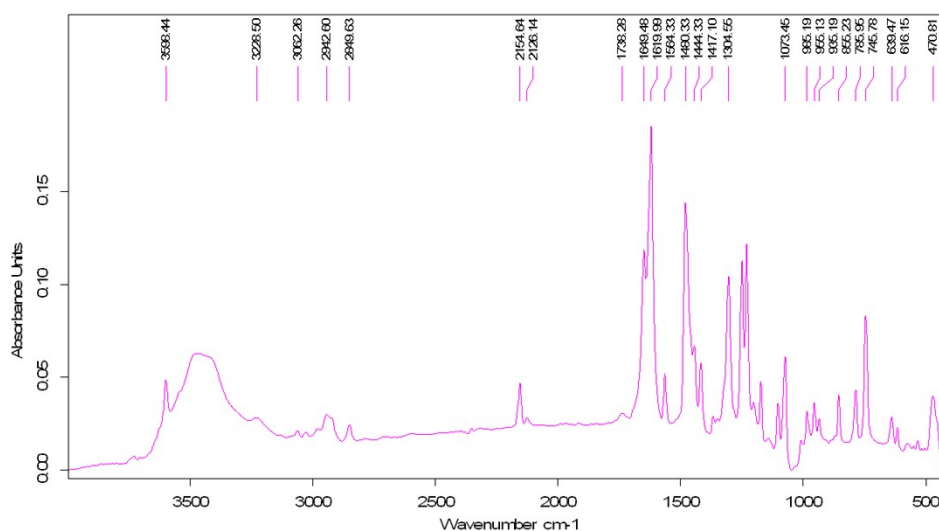

Figure S1. FTIR spectrum of 1.

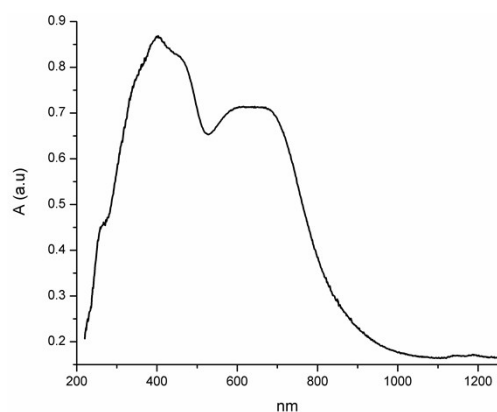

**Figure S2.** Solid-state UV-Vis spectrum of **1**.

The UV-Vis spectra of **1** exhibits three bands in the visible region: (i) the first peak at ca. 400 nm with a shoulder at 450 nm, which correspond most likely to the electronic transitions of the chromium(III) ion and (ii) two other absorptions at 610 and 705 nm that could be assigned to the d-d transitions of the square pyramidal copper(II) ions.

Lever, A.B.P. *Crystal Field Spectra Inorganic Electronic Spectroscopy*, 1st ed., Elsevier, Amsterdam, p. 249, (1968).

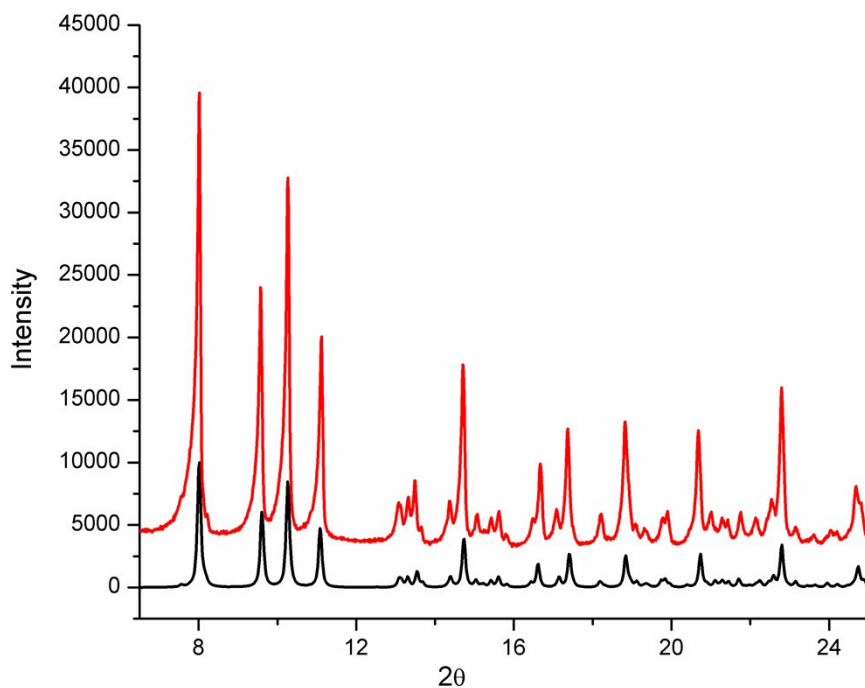

**Figure S3.** Experimental (red) and simulated (black) PXRD pattern for **1**.

**Table S1.** Crystallographic data, details of data collection and structure refinement parameters

|                                                                 |                                                                                                   |
|-----------------------------------------------------------------|---------------------------------------------------------------------------------------------------|
| Empirical formula                                               | C <sub>45</sub> H <sub>50</sub> CrCu <sub>2</sub> Mn <sub>2</sub> N <sub>10</sub> O <sub>15</sub> |
| Formula weight                                                  | 1231.54                                                                                           |
| Temperature/K                                                   | 293(2)                                                                                            |
| Crystal system                                                  | Triclinic                                                                                         |
| Space group                                                     | <i>P</i> -1                                                                                       |
| <i>a</i> /Å                                                     | 12.6009(6)                                                                                        |
| <i>b</i> /Å                                                     | 13.4206(10)                                                                                       |
| <i>c</i> /Å                                                     | 18.2930(10)                                                                                       |
| $\alpha$ /°                                                     | 101.278(5)                                                                                        |
| $\beta$ /°                                                      | 99.831(5)                                                                                         |
| $\gamma$ /°                                                     | 114.139(6)                                                                                        |
| <i>V</i> /Å <sup>3</sup>                                        | 2657.7(3)                                                                                         |
| <i>Z</i>                                                        | 2                                                                                                 |
| <i>D</i> <sub>calc</sub> /g cm <sup>-3</sup>                    | 1.574                                                                                             |
| $\mu$ /mm <sup>-1</sup>                                         | 1.521                                                                                             |
| Crystal size/mm <sup>3</sup>                                    | 0.2 × 0.05 × 0.02                                                                                 |
| $\theta_{\min}$ , $\theta_{\max}$ (deg)                         | 3.06 to 25.03                                                                                     |
| Reflections collected                                           | 23304                                                                                             |
| Independent reflections                                         | 9327 [ <i>R</i> <sub>int</sub> = 0.0596]                                                          |
| Data/restraints/parameters                                      | 9429/0/681                                                                                        |
| GOF <sup>c</sup>                                                | 1.023                                                                                             |
| <i>R</i> <sub>1</sub> <sup>a</sup> [ <i>I</i> > 2σ( <i>I</i> )] | 0.0565                                                                                            |
| <i>wR</i> <sub>2</sub> <sup>b</sup> (all data)                  | 0.0927                                                                                            |

<sup>a</sup> $R_1 = \frac{\sum ||F_o| - |F_c||}{\sum |F_o|}$ . <sup>b</sup> $wR_2 = \frac{\{\sum [w(F_o^2 - F_c^2)^2]\}}{\{\sum [w(F_o^2)]\}}^{1/2}$ . <sup>c</sup> GOF =  $\{\frac{\sum [w(F_o^2 - F_c^2)^2]}{(n-p)}\}^{1/2}$ , where *n* is the number of reflections and *p* is the total number of refined parameters.

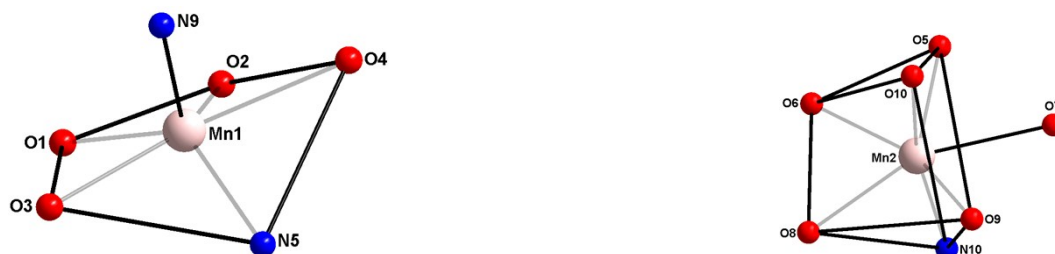**Figure S4.** Coordination geometry for Mn1 (distorted pentagonal pyramidal) and Mn2 (distorted monocapped trigonal prism).

**Table S2.** Results of the SHAPE1 analysis for  $\{\text{MnNO}_6\}$ ,  $\{\text{MnN}_2\text{O}_4\}$ ,  $\{\text{CuN}_2\text{O}_2\}$  and  $\{\text{CuN}_2\text{O}_3\}$  fragments in **1**.<sup>a</sup>

|                                                 |                     |                    |                           |                      |
|-------------------------------------------------|---------------------|--------------------|---------------------------|----------------------|
| <b>Structure [MnNO<sub>6</sub>]</b>             | PBPY-7 <sup>a</sup> | COC-7 <sup>a</sup> | <b>CTPR-7<sup>a</sup></b> | JPBPY-7 <sup>a</sup> |
|                                                 | 20.293              | 19.143             | <b>17.682</b>             | 27.377               |
| <b>Structure [MnN<sub>2</sub>O<sub>4</sub>]</b> | PPY-6 <sup>b</sup>  | OC-6 <sup>b</sup>  | TPR-6 <sup>b</sup>        | JPPY-5 <sup>b</sup>  |
|                                                 | <b>33.054</b>       | 39.270             | 34.418                    | 36.861               |

<sup>a</sup>PBPY-7,  $D_{5h}$  Pentagonal bipyramid; COC-7,  $C_{3v}$  Capped octahedron; CTPR-7,  $C_{2v}$  Capped trigonal prism; JPBPY-7,  $D_{5h}$  Johnson pentagonal bipyramid (J13)

<sup>b</sup>PPY-6,  $C_{5v}$  Pentagonal pyramid; OC-6,  $O_h$  Octahedron; TPR-6,  $D_{3h}$  Trigonal prism; JPPY-5,  $C_{5v}$  Johnson pentagonal pyramid (J2).

<sup>a</sup> (1) M. Llunell, D. Casanova, J. Cirera, J. M. Bofill, P. Alemany, S. Alvarez, M. Pinsky and D. Avnir, SHAPE: Continuous shape measures of polygonal and polyhedral molecular fragments, 1.1b, University of Barcelona: Barcelona, 2005; (2) D. Casanova, M. Llunell, P. Alemany, S. Alvarez, *Chem. Eur. J.*, 2005, **11**, 1479.

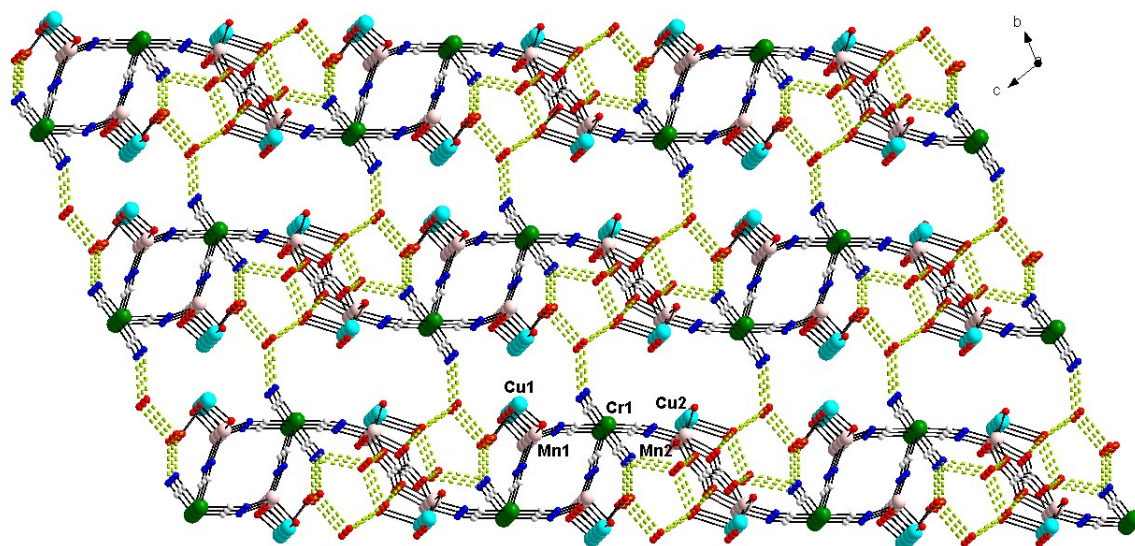

**Figure S5.** View of the fragment of the supramolecular 3 D supramolecular network of **1**. Hydrogen bonds are shown as dashed lines.

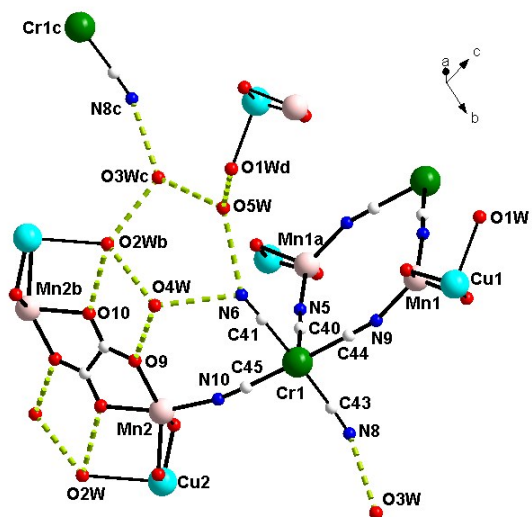

**Figure S6.** A detail of the hydrogen bonding in **1** illustrating the assembling role of the water molecules.

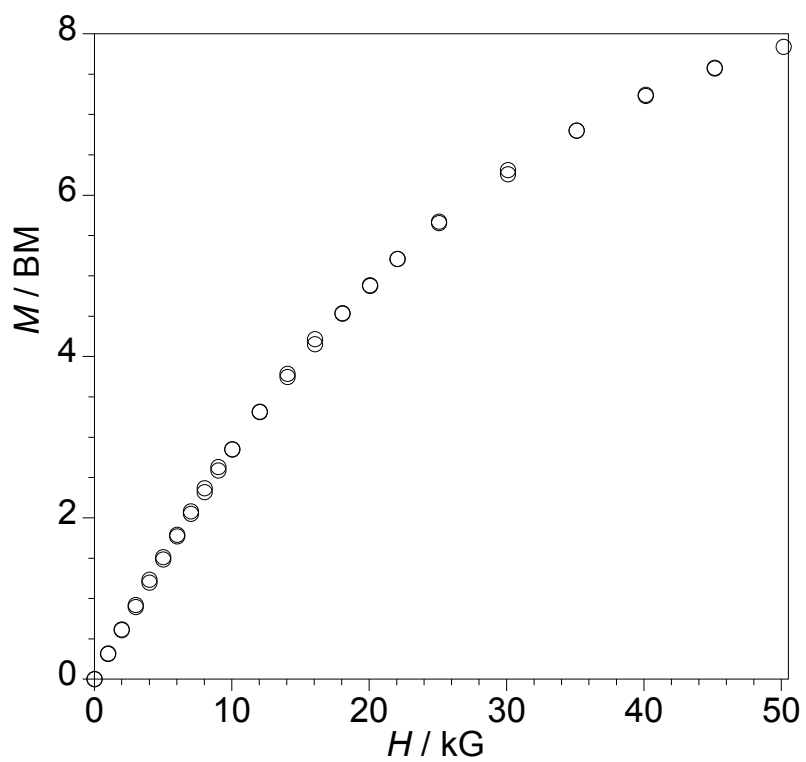

**Figure S7.** Field dependence of the magnetization for **1** at 2 K

**Table S3.** Geometrical parameters associated to the hydrogen bonds in **1**<sup>a,b</sup>

| D---H···A     | D – H/ Å | H···A/ Å | D···A/ Å | D - H···A, deg |
|---------------|----------|----------|----------|----------------|
| O3Wc ··· O2Wb | 0.86     | 2.07     | 2.822(5) | 145            |
| O5W ··· N6    | 0.86     | 2.17     | 3.016(7) | 168            |
| O3Wc ··· N8c  | 0.86     | 2.14     | 2.971(6) | 163            |
| O1Wd ··· O5W  | 0.89     | 1.91     | 2.780(8) | 168            |
| O5W ··· O3Wc  | 0.85     | 1.99     | 2.823(6) | 168            |
| O2Wb ··· O4W  | 0.86     | 2.04     | 2.769(5) | 142            |
| O4W ··· N6    | 0.86     | 2.11     | 2.951(6) | 167            |
| O2Wb ··· O10  | 0.86     | 2.00     | 2.842(6) | 164            |
| O4W ··· O9    | 0.86     | 2.01     | 2.840(6) | 161            |

<sup>a</sup> D = donor and A = acceptor; <sup>b</sup> Symmetry code: (b) = -x, -1-y, 1-z; (c) = x, -1+y, z; (d) = 2-x, -y, 2-z
